# Supplementary material for: Novel Circoviruses Detected in Feces of Sonoran Felids
Source: Viruses. 2020 Sep 15;12(9):1027. doi: 10.3390/v12091027 (PMC7551060; doi:10.3390/v12091027)
Supplement: Supplementary file 1 [file viruses-12-01027-s001.xlsx]

## Sheet: Genome
KU230452_TiACV1	100.001
GQ404851_ChimpACV	73.101	100.001
DQ172906_StCV	71.301	71.301	100.001
AF252610_PiCV	69.301	68.701	68.001	100.001
MH188038_MosACV	66.901	66.801	66.601	69.601	100.001
AJ301633_CaPV	66.801	66.001	69.101	64.401	64.001	100.001
DQ146997_RaCV	68.501	67.101	66.301	68.301	63.501	70.501	100.001
KX987146_TiACV2	67.901	67.601	68.901	67.501	64.201	70.501	77.101	100.001
DQ845075_FiCV	69.001	68.001	67.301	65.301	62.501	68.901	68.801	69.701	100.001
KP793918_ZfiCV	68.301	67.401	66.401	64.901	65.201	67.801	69.401	70.401	79.401	100.001
DQ845074_GuCV	62.901	63.701	62.901	65.301	61.701	63.101	62.501	64.401	65.501	62.601	100.001
MN164703_PenCV	62.001	62.301	62.801	62.701	64.801	62.501	63.701	65.601	61.501	63.101	66.601	100.001
AF071878_BFDV	60.301	63.301	62.201	65.201	62.901	62.801	64.101	64.301	62.701	62.101	61.301	63.201	100.001
AF027217_PCV2	59.601	58.201	59.001	58.701	59.401	57.501	60.001	59.201	59.101	59.501	57.701	58.401	60.501	100.001
AF071879_PCV1	59.701	59.601	60.001	60.601	60.901	57.701	59.201	62.201	59.301	58.201	59.101	57.901	59.601	78.701	100.001
KC339249_BatACV2	58.001	56.401	60.001	59.501	59.201	58.201	57.801	56.401	57.501	56.901	57.501	57.901	59.101	68.201	67.901	100.001
KX756996_BatACV11	58.301	58.101	59.801	59.401	58.401	57.501	57.501	57.701	58.701	58.901	58.601	58.101	60.501	68.901	70.701	73.101	100.001
KJ641741_BatACV9	60.801	59.401	59.301	62.001	58.301	57.801	56.501	57.601	59.501	59.101	57.701	57.801	59.401	64.001	63.901	63.701	64.001	100.001
KX756986_BatACV10	60.201	59.501	60.401	60.501	56.901	61.301	60.001	60.101	60.301	60.401	59.301	59.901	58.401	60.301	60.801	61.101	62.001	60.901	100.001
MT610106_SonCV2	60.201	60.601	60.401	60.101	58.701	60.301	59.401	61.201	62.101	61.001	60.501	57.901	60.001	60.701	60.001	61.701	60.901	61.301	62.801	100.001
KC241982_CanineCV	59.401	61.601	59.601	61.001	58.901	59.901	60.701	60.601	59.701	58.101	59.801	59.901	60.101	60.001	60.001	60.101	59.801	60.001	61.101	59.301	100.001
MF497827_RoACV7	59.901	57.401	59.901	60.001	61.001	59.401	59.601	60.301	59.801	60.201	60.901	58.901	60.301	60.301	61.201	62.501	62.001	61.001	61.701	62.601	67.901	100.001
KY370029_RoACV4	60.901	61.301	58.001	60.601	59.401	57.501	59.701	60.601	59.801	60.101	58.901	59.501	61.301	58.501	60.501	59.101	61.501	60.701	62.901	61.901	67.001	67.201	100.001
KY370034_RoACV1	59.401	59.601	58.101	59.901	57.601	59.401	58.901	59.101	58.901	58.001	59.701	62.101	59.501	61.201	61.801	59.601	61.201	60.401	62.601	59.301	65.301	66.901	66.501	100.001
KY370042_RoACV2	60.801	57.601	58.101	59.601	56.801	60.601	57.101	59.501	58.801	58.501	61.701	60.701	58.901	60.101	61.701	61.001	61.001	59.101	61.301	61.001	64.901	68.001	66.701	78.401	100.001
KY370039_RoACV3	60.001	59.601	57.601	61.001	56.301	59.601	58.601	59.601	58.301	59.801	59.401	60.501	59.901	60.101	61.001	60.501	60.601	60.001	61.801	59.801	63.601	66.201	64.801	77.401	74.301	100.001
MT610105_SonCV1	58.701	60.301	59.701	57.901	55.501	60.601	58.201	60.201	59.601	59.101	60.301	59.301	58.601	60.601	61.001	59.801	60.501	59.601	61.101	60.801	63.501	67.201	64.601	69.001	69.801	67.301	100.001
MT610107_SonCV1	58.801	60.001	58.801	59.501	57.601	60.101	58.401	59.401	59.401	60.401	59.601	59.701	58.201	60.601	61.801	59.601	61.001	60.401	61.201	60.901	63.101	67.401	64.101	69.501	70.801	67.601	97.801	100.001
JQ814849_BatACV3	59.601	58.501	58.701	56.901	57.001	57.301	56.901	57.801	59.101	58.001	59.001	58.401	60.201	59.701	59.701	61.201	60.401	62.301	59.701	60.001	57.901	59.501	58.701	58.901	60.201	57.601	57.701	57.901	100.001
KT783484_BatACV4	59.801	58.401	60.101	59.101	58.801	58.301	58.801	59.201	57.501	60.401	58.801	57.801	59.201	59.101	61.501	59.101	60.001	58.501	60.201	59.601	58.301	59.301	59.601	59.401	59.901	58.901	59.401	60.001	75.501	100.001
JX863737_BatACV1	60.001	57.401	60.401	59.101	57.201	58.701	58.401	59.301	57.201	56.701	56.701	59.601	57.601	62.301	61.901	62.401	62.501	59.201	60.801	59.601	60.301	60.901	61.001	59.101	61.801	61.301	64.601	64.201	59.701	61.001	100.001
KJ020099_MiCV	56.801	57.901	58.601	60.201	56.901	57.201	58.201	58.701	59.001	58.401	58.301	59.401	60.401	62.301	60.901	61.101	60.301	60.101	60.101	61.101	60.001	61.701	60.001	61.401	62.201	61.901	59.401	59.001	62.601	60.301	68.101	100.001
LC416389_PanACV	59.301	58.801	58.401	60.301	55.101	58.701	60.001	58.501	58.001	56.901	56.501	58.701	56.601	56.801	59.401	60.801	56.201	58.801	58.301	59.201	58.301	59.701	59.001	57.401	59.001	59.801	58.801	58.401	58.201	59.001	60.201	61.201	100.001
KY370027_RoACV5	62.101	58.001	60.901	58.701	57.201	59.101	59.501	59.401	60.001	57.301	59.501	56.901	58.801	58.101	58.701	60.901	59.301	57.901	58.601	57.201	59.901	58.901	59.801	59.101	60.201	60.201	60.201	60.001	59.901	60.001	60.901	59.401	65.101	100.001
GQ404856_HuACV	60.101	58.001	59.901	59.901	57.101	58.401	59.301	59.501	58.701	57.601	59.001	57.401	58.401	59.301	58.901	58.801	58.101	59.301	58.501	60.401	58.901	58.201	59.501	58.601	58.801	59.301	60.701	60.101	58.001	59.701	62.001	60.301	58.201	60.501	100.001
JQ011377_EcatfishCV	60.301	57.501	61.401	59.801	57.001	59.701	59.601	59.201	59.101	59.701	60.801	59.501	57.201	60.801	58.201	60.701	57.601	57.801	57.901	61.301	58.301	59.701	59.601	60.401	60.101	59.501	60.101	60.201	61.401	59.701	59.501	59.901	61.001	59.101	61.901	100.001
GU799606_BarCV	60.601	57.701	59.801	58.501	57.001	57.201	59.201	58.901	57.601	58.501	59.501	58.301	58.701	59.601	59.401	59.701	58.801	58.601	59.201	58.101	58.201	58.601	58.901	58.201	59.601	58.401	60.201	59.001	60.901	58.401	59.501	59.501	60.901	58.301	62.001	61.001	100.001
KY370037_RoACV6	59.901	61.701	61.001	60.401	59.101	60.401	61.701	59.201	61.501	58.701	59.801	59.601	60.701	59.801	61.101	59.701	58.401	59.501	59.801	61.701	59.601	62.401	63.901	62.701	59.701	60.401	62.001	60.701	61.301	61.201	59.901	60.001	61.501	62.501	59.201	59.601	61.301	100.001
KJ641723_BatACV7	60.301	59.701	59.901	61.101	58.201	58.801	60.201	58.801	58.801	59.501	58.401	59.001	59.801	56.501	58.001	60.801	59.901	61.001	62.301	63.501	60.201	60.501	60.101	60.401	59.501	59.101	58.701	59.101	59.901	59.801	60.301	57.901	58.401	60.401	58.901	58.701	58.601	65.101	100.001
KJ641724_BatACV6	62.401	62.201	61.401	60.601	58.201	61.101	61.601	58.401	60.101	59.101	58.401	58.301	59.501	59.501	60.601	59.801	61.701	59.901	63.301	62.201	60.501	60.401	61.101	59.801	58.001	60.401	58.801	59.001	61.501	59.101	63.101	58.901	59.901	58.701	59.001	57.401	59.001	64.801	68.001	100.001
KJ641711_BatACV8	59.601	59.501	60.701	61.401	58.201	58.301	62.101	59.701	60.801	59.801	59.401	59.801	60.601	60.601	59.201	59.101	58.201	61.301	61.401	60.201	59.801	60.901	61.401	60.101	60.101	59.101	59.401	60.001	61.201	60.301	61.401	59.201	58.601	59.601	59.301	58.301	59.801	64.801	62.901	65.501	100.001
KJ641727_BatACV5	57.801	60.601	61.401	59.301	58.701	60.201	59.201	60.401	63.101	61.901	59.501	58.901	59.501	59.401	61.201	61.201	60.101	59.201	61.201	62.001	59.501	59.901	60.801	61.601	59.301	61.201	59.701	59.901	60.201	60.301	60.601	62.701	58.901	59.501	60.601	57.101	58.701	64.901	64.401	64.101	72.901	100.001
KJ641716_BatACV12	59.901	60.601	60.301	58.201	57.501	60.901	61.101	62.101	60.401	60.301	60.701	60.401	58.601	59.101	60.101	59.701	58.901	58.101	59.501	60.101	60.601	59.601	58.901	58.401	59.201	60.801	61.101	60.701	61.901	59.601	61.001	61.601	61.101	62.401	60.301	56.701	58.501	64.101	64.901	65.401	69.401	73.701	100.001
KT86907_PCV3	58.801	60.301	59.301	61.001	58.001	60.801	60.101	60.601	61.201	57.801	58.201	57.601	59.801	57.301	59.601	58.101	56.801	56.901	58.301	60.601	61.101	62.701	62.001	61.301	62.101	60.301	60.001	62.201	60.501	60.901	60.701	61.501	61.001	59.301	59.901	58.501	60.601	64.001	60.101	60.501	62.201	62.201	62.001	100.001
DQ100076_DuCV	58.701	59.101	57.501	58.201	60.801	57.701	58.701	58.101	56.901	58.601	57.701	58.401	56.801	60.101	60.201	59.201	59.701	57.901	58.801	58.901	57.801	57.001	58.301	59.401	57.901	58.301	56.901	59.101	57.601	57.701	59.901	57.701	58.401	57.801	57.901	57.701	58.501	59.001	58.201	60.001	58.601	58.401	58.001	58.201	100.001
AJ304456_GoCV	59.901	59.001	57.101	60.301	58.501	58.401	58.901	58.401	57.201	61.601	60.401	58.501	60.901	59.401	60.201	58.601	60.301	59.301	58.801	61.201	60.101	58.401	58.901	59.101	58.001	58.501	60.901	59.601	57.501	60.101	56.601	58.601	59.201	59.301	59.001	58.501	61.301	61.401	59.301	57.201	59.401	59.601	60.301	61.601	71.001	100.001
EU056309_SwCV	59.101	57.501	60.101	58.101	59.401	57.101	61.801	61.301	58.801	59.201	59.201	58.201	60.301	60.601	61.501	58.901	60.101	59.301	60.901	61.901	59.901	59.601	60.601	60.201	59.701	61.701	59.101	59.401	56.401	58.601	59.201	58.301	58.601	59.501	59.701	58.301	59.201	60.001	59.901	60.001	60.701	56.901	59.501	58.301	69.301	75.601	100.001
	KU230452_TiACV1	GQ404851_ChimpACV	DQ172906_StCV	AF252610_PiCV	MH188038_MosACV	AJ301633_CaPV	DQ146997_RaCV	KX987146_TiACV2	DQ845075_FiCV	KP793918_ZfiCV	DQ845074_GuCV	MN164703_PenCV	AF071878_BFDV	AF027217_PCV2	AF071879_PCV1	KC339249_BatACV2	KX756996_BatACV11	KJ641741_BatACV9	KX756986_BatACV10	MT610106_SonCV2	KC241982_CanineCV	MF497827_RoACV7	KY370029_RoACV4	KY370034_RoACV1	KY370042_RoACV2	KY370039_RoACV3	MT610105_SonCV1	MT610107_SonCV1	JQ814849_BatACV3	KT783484_BatACV4	JX863737_BatACV1	KJ020099_MiCV	LC416389_PanACV	KY370027_RoACV5	GQ404856_HuACV	JQ011377_EcatfishCV	GU799606_BarCV	KY370037_RoACV6	KJ641723_BatACV7	KJ641724_BatACV6	KJ641711_BatACV8	KJ641727_BatACV5	KJ641716_BatACV12	KT86907_PCV3	DQ100076_DuCV	AJ304456_GoCV	EU056309_SwCV

## Sheet: Rep
MN164703_PenCV	100.001
DQ845074_GuCV	66.801	100.001
AF252610_PiCV	65.401	61.601	100.001
MH188038_MosACV	64.401	58.201	72.201	100.001
AJ301633_CaPV	67.501	66.101	69.301	65.201	100.001
DQ146997_RaCV	67.101	61.201	72.901	67.701	76.901	100.001
KX987146_TiACV2	66.101	60.201	72.501	68.401	75.501	85.901	100.001
KU230452_TiACV1	66.801	60.901	75.901	67.701	77.201	80.701	82.101	100.001
GQ404851_ChimpACV	66.401	60.601	73.901	69.801	75.501	80.101	78.301	82.101	100.001
DQ172906_StCV	67.401	63.501	73.401	69.801	76.501	78.901	81.301	78.901	79.201	100.001
DQ845075_FiCV	67.501	65.101	72.501	67.401	75.501	77.701	77.001	78.601	79.401	83.401	100.001
KP793918_ZfiCV	65.701	61.601	70.401	66.301	74.101	75.601	76.301	79.701	80.401	80.301	87.601	100.001
AF071878_BFDV	60.901	55.001	61.201	58.501	58.801	58.101	62.801	58.801	61.901	60.801	62.301	60.601	100.001
GQ404856_HuACV	51.601	51.701	54.301	45.301	50.001	51.601	51.201	52.101	53.301	52.201	54.301	51.501	53.701	100.001
JQ011377_EcatfishCV	48.401	44.801	49.001	47.501	49.801	50.701	49.001	50.201	49.301	51.101	52.401	50.301	47.501	54.901	100.001
GU799606_BarCV	49.101	51.001	47.701	43.301	49.301	48.501	48.501	47.901	47.201	48.801	52.201	49.101	46.401	51.801	49.201	100.001
JQ814849_BatACV3	48.401	47.901	48.301	46.501	48.601	49.001	49.001	48.601	48.801	47.901	48.301	47.901	47.001	46.601	51.401	48.801	100.001
KT783484_BatACV4	49.701	49.101	46.101	46.501	49.801	47.601	48.301	50.701	50.701	49.301	48.601	49.701	48.301	48.301	48.501	45.201	85.001	100.001
KJ641711_BatACV8	52.801	53.401	52.901	48.901	47.201	47.701	49.801	48.601	47.701	50.201	52.501	50.201	46.501	46.601	51.701	48.701	53.301	48.501	100.001
KJ641716_BatACV12	53.001	53.201	54.401	49.801	51.401	49.501	51.701	52.101	49.101	53.701	51.601	50.901	45.501	48.601	48.301	50.801	51.901	49.501	74.801	100.001
KJ641727_BatACV5	50.201	50.201	52.101	46.801	50.701	48.901	48.901	47.901	47.501	48.901	50.401	48.601	46.601	49.701	50.701	51.401	54.901	52.801	75.101	76.801	100.001
KY370037_RoACV6	51.601	51.401	47.101	48.001	49.101	48.301	49.101	47.201	47.601	50.401	50.301	49.501	45.601	51.201	50.301	51.301	53.701	52.901	65.201	63.001	70.501	100.001
KJ641723_BatACV7	49.001	48.801	47.601	46.201	47.901	47.001	48.301	47.701	48.601	49.301	50.201	49.001	46.501	47.901	45.501	46.301	53.801	49.201	66.801	61.701	66.201	63.601	100.001
KJ641724_BatACV6	47.401	44.201	47.401	44.301	46.001	46.301	48.801	47.201	46.301	48.101	49.101	49.501	44.101	47.301	47.801	43.801	50.901	51.901	61.801	62.801	63.401	59.301	67.501	100.001
KT869077_PCV3	46.501	48.201	49.301	45.501	46.101	45.101	46.501	46.201	46.901	46.201	49.301	47.601	48.801	49.301	51.401	49.801	51.901	53.701	55.601	55.601	54.601	56.401	55.101	53.901	100.001
KY370027_RoACV5	46.301	42.301	46.201	44.601	42.901	45.701	47.101	45.501	44.301	45.501	46.701	44.601	45.201	47.001	46.101	45.201	44.301	42.001	51.601	53.201	51.901	49.201	47.401	48.101	53.701	100.001
LC416389_PanACV	43.901	43.901	49.101	41.801	43.201	45.301	46.001	45.301	44.901	45.501	46.301	44.601	43.101	47.801	47.201	48.601	47.101	45.201	52.901	51.201	51.901	50.901	52.001	50.701	55.101	63.001	100.001
AJ304456_GoCV	47.601	46.701	49.001	46.601	47.601	47.901	50.001	49.301	49.701	51.201	51.401	52.101	45.501	48.801	42.001	42.801	47.601	49.101	44.901	44.901	43.001	45.301	41.901	43.001	46.201	39.901	42.001	100.001
EU056309_SwCV	48.301	46.701	48.301	45.901	46.701	47.401	49.301	48.801	48.601	51.201	51.601	51.201	45.501	48.501	43.601	43.201	45.101	49.801	45.501	45.101	44.401	44.401	43.301	42.401	45.301	42.201	43.901	85.301	100.001
DQ100076_DuCV	48.301	47.801	51.701	47.001	47.601	48.601	48.601	50.001	50.301	50.201	51.001	51.701	46.701	45.501	43.301	44.201	47.901	50.501	44.401	44.101	44.401	45.701	42.901	44.601	45.801	39.001	42.001	82.901	78.401	100.001
AF027217_PCV2	44.401	41.501	47.501	42.201	43.401	42.301	44.101	46.601	43.801	44.601	45.701	47.101	46.201	49.301	51.001	43.101	46.501	45.601	46.101	45.801	46.201	47.001	44.301	45.101	47.901	45.801	44.401	47.601	44.901	45.701	100.001
AF071879_PCV1	44.401	42.201	47.901	42.201	45.501	43.601	44.201	47.201	44.101	45.301	46.001	47.101	45.701	45.701	49.801	42.901	45.701	44.301	46.901	46.601	45.901	47.101	44.701	45.201	46.401	45.901	44.501	46.201	44.501	46.001	86.501	100.001
KX756996_BatACV11	46.401	43.901	47.101	42.601	46.601	44.001	42.301	47.201	46.401	43.901	47.101	47.101	47.101	44.701	51.401	44.401	46.901	47.401	47.101	46.101	48.301	48.001	46.601	46.801	47.401	49.001	47.101	46.601	44.201	45.001	73.101	75.201	100.001
KC339249_BatACV2	47.801	43.601	49.301	45.001	44.801	43.601	44.401	47.201	44.301	46.001	47.101	46.701	47.401	46.801	53.401	45.801	47.201	43.801	47.301	45.801	46.601	47.501	44.801	43.901	49.101	46.201	45.401	43.701	42.601	43.301	68.701	67.801	73.101	100.001
KJ641741_BatACV9	47.101	46.001	49.701	43.301	44.801	43.601	46.101	47.601	47.101	46.501	46.001	46.001	47.401	45.201	46.801	42.001	45.001	45.101	47.301	44.701	47.601	45.901	46.501	47.301	47.901	44.301	45.101	46.401	45.401	47.101	61.501	60.501	62.401	63.101	100.001
KC241982_CanineCV	50.301	50.301	47.201	42.201	48.401	44.501	46.301	44.601	45.901	46.901	48.301	45.901	47.201	49.001	47.801	45.001	46.201	45.401	48.001	47.601	47.601	47.501	48.001	47.801	52.601	47.001	47.701	50.001	49.801	48.601	52.701	52.601	52.201	52.601	54.401	100.001
MF497827_RoACV7	47.901	47.201	46.301	41.701	48.101	47.201	46.801	44.301	45.501	46.501	46.901	48.301	49.801	49.701	46.601	42.101	47.601	47.301	44.901	44.901	46.501	48.301	44.601	45.801	50.201	45.901	47.001	49.001	47.401	49.101	49.501	49.701	51.201	50.001	52.901	73.301	100.001
KY370029_RoACV4	47.201	48.301	46.801	42.901	45.701	45.501	45.201	44.301	45.201	45.501	45.501	46.601	47.901	49.001	45.801	44.301	45.501	46.401	44.301	45.001	48.401	49.001	44.401	46.601	51.201	45.801	46.501	47.101	47.101	48.401	49.801	51.001	51.901	51.001	53.401	71.401	73.301	100.001
KY370034_RoACV1	49.001	46.501	45.801	40.501	48.401	46.201	45.901	44.601	46.901	46.901	46.201	44.501	46.201	51.901	50.901	44.001	44.701	44.601	49.501	50.001	47.601	48.001	47.001	49.001	51.201	47.701	45.801	49.501	50.701	47.801	49.701	50.201	53.401	49.801	52.001	64.901	66.701	65.801	100.001
KY370039_RoACV3	48.601	45.801	46.101	40.801	47.801	46.201	46.401	45.001	46.901	47.601	46.601	45.901	46.501	50.301	48.801	43.901	44.001	42.901	50.201	48.601	47.601	47.601	47.601	48.001	49.501	46.601	46.201	48.101	48.801	48.601	50.301	52.201	54.101	51.201	53.201	64.201	66.001	65.101	87.401	100.001
KY370042_RoACV2	49.001	47.201	46.101	41.901	50.501	47.201	47.301	45.301	47.201	48.301	47.901	46.201	46.201	49.501	49.201	42.901	46.301	45.901	49.101	48.801	48.401	50.201	46.801	47.501	51.201	46.801	48.101	47.401	46.701	46.001	52.901	51.901	53.001	52.501	50.501	64.901	68.301	63.801	85.401	83.401	100.001
MT610105_SonCV1	46.201	45.801	42.101	39.401	46.401	44.101	44.601	43.601	43.401	45.101	43.401	46.901	40.601	45.201	45.101	42.101	44.801	45.901	44.901	46.701	46.901	43.901	44.901	42.901	47.701	46.401	46.701	47.801	48.801	48.801	51.901	52.001	50.501	50.701	52.001	64.501	66.301	62.101	68.101	67.801	69.801	100.001
MT610107_SonCV1	46.201	45.801	42.101	39.401	46.401	44.101	44.901	43.301	43.401	45.101	43.401	46.901	40.601	45.201	45.101	42.101	44.801	45.901	44.901	46.701	46.901	44.301	44.901	42.901	47.701	46.401	46.301	47.401	48.401	48.401	51.901	51.701	50.501	50.701	52.001	64.501	66.301	62.101	68.101	67.801	69.801	99.301	100.001
KX756986_BatACV10	49.801	46.701	50.801	42.901	47.601	48.501	51.501	50.001	49.101	50.501	50.501	50.901	47.301	51.701	47.001	44.901	48.401	45.001	52.201	50.901	50.701	52.901	52.201	51.501	50.301	46.801	48.101	46.401	46.401	46.701	54.501	54.401	52.201	52.001	53.401	60.701	58.701	60.101	56.501	55.801	54.801	56.501	56.801	100.001
MT610106_SonCV2	47.001	45.001	50.501	43.101	49.801	48.401	50.501	48.801	49.101	48.201	48.401	48.401	47.001	52.101	44.701	49.501	45.301	43.201	49.501	50.701	50.401	51.201	51.801	50.501	47.501	44.501	45.901	49.301	46.801	49.601	53.501	54.001	53.101	51.901	54.501	58.901	56.601	59.101	55.601	57.001	53.501	54.201	54.201	64.101	100.001
JX863737_BatACV1	46.301	46.801	48.801	42.301	47.601	47.901	48.301	47.201	47.701	50.701	50.701	51.201	48.101	51.401	50.301	49.701	50.501	50.501	55.101	54.101	54.101	50.901	51.901	50.701	49.101	44.401	48.801	50.501	50.201	49.801	49.801	50.901	48.501	48.101	47.401	55.901	54.201	56.501	56.801	55.401	56.101	56.801	56.801	54.701	51.001	100.001
KJ020099_MiCV	47.001	47.901	48.401	40.801	48.301	47.901	47.201	46.701	47.401	48.401	49.001	49.101	47.701	50.001	49.801	48.801	53.101	51.201	53.701	52.601	53.001	51.201	50.201	49.301	50.501	41.701	45.601	51.001	51.201	52.701	50.201	50.901	49.801	49.801	48.801	58.001	53.301	54.301	58.501	56.401	56.801	55.201	55.201	54.901	49.001	79.901	100.001
	MN164703_PenCV	DQ845074_GuCV	AF252610_PiCV	MH188038_MosACV	AJ301633_CaPV	DQ146997_RaCV	KX987146_TiACV2	KU230452_TiACV1	GQ404851_ChimpACV	DQ172906_StCV	DQ845075_FiCV	KP793918_ZfiCV	AF071878_BFDV	GQ404856_HuACV	JQ011377_EcatfishCV	GU799606_BarCV	JQ814849_BatACV3	KT783484_BatACV4	KJ641711_BatACV8	KJ641716_BatACV12	KJ641727_BatACV5	KY370037_RoACV6	KJ641723_BatACV7	KJ641724_BatACV6	KT869077_PCV3	KY370027_RoACV5	LC416389_PanACV	AJ304456_GoCV	EU056309_SwCV	DQ100076_DuCV	AF027217_PCV2	AF071879_PCV1	KX756996_BatACV11	KC339249_BatACV2	KJ641741_BatACV9	KC241982_CanineCV	MF497827_RoACV7	KY370029_RoACV4	KY370034_RoACV1	KY370039_RoACV3	KY370042_RoACV2	MT610105_SonCV1	MT610107_SonCV1	KX756986_BatACV10	MT610106_SonCV2	JX863737_BatACV1	KJ020099_MiCV

## Sheet: CP
MN164703_PenCV	100.001
DQ845074_GuCV	57.601	100.001
AF071878_BFDV	53.101	50.201	100.001
AF252610_PiCV	40.301	48.001	46.801	100.001
MH188038_MosACV	41.401	42.001	45.601	65.801	100.001
DQ172906_StCV	44.101	45.601	47.701	57.001	60.201	100.001
GQ404851_ChimpACV	45.701	45.701	47.001	60.901	62.201	75.001	100.001
KU230452_TiACV1	45.201	45.901	46.401	60.701	63.701	71.401	79.801	100.001
AJ301633_CaPV	46.001	45.001	42.401	47.501	46.201	55.201	49.301	51.901	100.001
DQ146997_RaCV	47.401	48.101	43.201	46.201	46.501	50.201	44.601	46.501	75.301	100.001
KX987146_TiACV2	48.601	47.201	47.801	44.801	46.501	50.401	44.601	46.501	76.601	87.001	100.001
DQ845075_FiCV	49.301	46.901	48.201	48.701	46.101	51.701	50.801	52.401	67.701	61.201	62.201	100.001
KP793918_ZfiCV	50.501	51.101	49.101	49.401	48.501	50.201	48.501	51.201	63.101	61.001	62.001	75.201	100.001
MT610105_SonCV1	30.801	34.101	34.401	31.901	31.101	31.901	29.701	32.701	30.601	35.401	33.501	31.501	33.001	100.001
MT610107_SonCV1	30.801	35.001	33.801	30.901	30.501	31.001	28.201	30.701	30.601	37.701	33.501	28.801	32.901	97.801	100.001
KY370034_RoACV1	26.501	30.301	31.901	29.101	27.101	29.301	23.001	28.001	29.301	30.001	28.101	29.701	31.401	58.401	58.001	100.001
KY370042_RoACV2	26.701	34.801	31.001	28.501	26.301	27.701	25.601	27.601	29.701	30.701	29.501	31.501	29.401	60.901	59.801	73.501	100.001
KY370039_RoACV3	26.601	36.601	28.601	28.801	29.401	30.701	26.301	32.201	29.301	30.001	29.301	29.901	31.701	57.901	57.501	73.901	67.001	100.001
KC241982_CanineCV	28.001	31.001	29.701	27.901	27.201	30.701	30.801	29.301	26.201	29.501	26.001	23.901	28.801	49.001	49.001	46.001	47.801	46.401	100.001
KY370029_RoACV4	31.801	35.401	33.501	30.301	28.601	32.701	26.601	29.301	27.201	36.201	33.001	30.301	30.901	50.001	50.001	48.301	45.701	50.601	58.601	100.001
MF497827_RoACV7	29.801	30.701	35.101	30.401	26.901	25.801	23.001	27.901	25.301	28.301	27.601	28.901	31.401	51.601	51.601	51.401	48.001	51.401	57.601	58.701	100.001
MT610106_SonCV2	31.401	28.601	30.501	31.301	28.001	28.401	27.501	29.901	31.901	36.501	33.901	28.501	30.101	39.401	38.601	46.001	41.001	45.301	38.101	40.801	39.801	100.001
KX756986_BatACV10	28.201	31.201	28.401	28.801	29.901	27.801	28.701	29.801	30.501	34.601	31.701	29.301	30.201	38.501	37.701	39.901	41.801	39.801	38.401	38.401	40.601	45.401	100.001
AF027217_PCV2	32.801	37.401	32.901	33.501	34.101	33.001	31.701	35.701	31.301	26.801	29.101	34.001	32.101	31.101	30.701	29.601	30.901	33.601	30.201	27.501	26.401	35.901	30.601	100.001
AF071879_PCV1	32.601	32.201	28.301	31.201	31.801	33.601	29.201	33.501	31.701	31.001	34.001	33.001	36.901	27.501	27.201	29.001	29.601	30.901	31.301	31.201	28.401	31.801	30.601	67.101	100.001
KC339249_BatACV2	32.501	33.201	36.301	29.901	31.601	33.601	33.701	32.501	30.801	30.401	30.301	34.001	35.801	32.401	32.901	29.801	30.301	32.001	30.601	24.801	29.601	32.201	31.401	52.601	53.501	100.001
KX756996_BatACV11	30.101	28.601	27.901	25.901	27.901	29.101	25.401	26.601	30.401	27.401	28.601	27.801	31.501	26.001	26.401	30.001	30.401	32.601	29.301	24.101	27.401	27.601	28.401	53.501	53.101	55.401	100.001
JX863737_BatACV1	27.301	26.001	32.701	25.701	30.801	27.801	27.201	27.001	27.801	32.501	30.201	28.201	29.801	27.201	26.301	30.001	27.101	27.101	30.201	27.501	34.701	33.801	29.301	44.601	40.201	39.501	42.101	100.001
KJ020099_MiCV	28.401	29.401	28.101	30.001	27.601	30.101	28.601	30.701	30.801	29.001	31.101	30.301	32.601	32.301	31.801	33.501	35.701	37.901	28.601	30.901	32.001	32.901	31.401	46.801	46.801	43.701	45.301	47.701	100.001
KJ641741_BatACV9	27.601	28.301	26.801	25.501	27.401	27.001	24.601	27.101	29.201	28.401	25.701	30.901	30.701	26.201	26.701	30.801	28.901	35.101	27.401	26.701	28.801	29.301	28.301	39.401	38.001	39.801	37.901	35.701	40.201	100.001
JQ814849_BatACV3	32.101	30.101	32.501	33.801	29.401	35.801	26.501	32.801	29.701	27.601	30.201	29.001	34.701	29.001	30.401	28.401	29.101	26.501	25.601	26.901	29.701	29.001	28.401	33.501	32.901	33.501	32.901	33.501	35.201	30.701	100.001
KT783484_BatACV4	31.801	32.201	31.301	31.101	28.501	30.601	26.701	28.101	29.301	31.101	32.501	28.001	29.901	25.801	25.801	26.401	28.001	24.001	25.201	31.401	29.301	30.801	29.601	36.401	33.301	37.001	36.101	35.701	35.201	30.301	71.401	100.001
AJ304456_GoCV	26.501	26.701	28.401	34.101	28.701	30.401	25.501	28.901	26.601	27.901	27.501	29.001	26.501	28.301	28.301	28.801	29.901	30.201	28.801	28.201	30.001	29.401	32.201	33.801	34.301	33.001	31.001	37.101	35.301	32.001	34.801	34.101	100.001
EU056309_SwCV	30.501	32.401	30.701	34.101	31.401	32.001	29.001	30.501	27.501	28.501	27.701	29.901	28.601	33.601	33.601	25.201	28.001	28.601	28.401	29.601	31.901	34.101	28.601	32.101	33.301	32.901	29.501	34.401	30.001	32.701	31.501	28.001	65.201	100.001
DQ100076_DuCV	25.401	28.801	30.601	29.201	28.101	28.301	26.101	30.801	26.001	25.701	26.801	25.301	22.501	31.001	30.601	31.401	31.901	31.001	29.601	24.501	28.801	26.101	27.801	33.501	31.501	34.301	30.701	27.601	27.301	33.201	35.001	29.601	49.401	55.101	100.001
GQ404856_HuACV	28.901	32.501	27.701	27.101	20.001	27.001	24.601	25.601	25.801	27.701	27.701	28.301	28.601	25.401	25.801	27.601	23.901	28.801	26.601	30.201	29.301	28.001	25.701	26.801	27.501	25.501	23.501	27.101	27.301	24.601	22.901	26.001	26.101	29.101	25.101	100.001
JQ011377_EcatfishCV	22.201	27.601	26.301	28.601	22.701	26.801	20.501	24.801	27.601	25.501	23.801	28.901	28.401	27.701	28.801	27.801	28.601	24.101	24.801	25.901	31.301	30.101	23.901	25.701	26.301	26.801	27.101	24.801	26.101	28.001	27.501	24.601	25.801	26.401	27.601	37.601	100.001
GU799606_BarCV	26.301	29.201	24.501	32.201	28.801	26.101	26.801	28.101	29.201	28.801	31.401	27.801	27.301	24.701	27.501	28.901	30.701	26.301	22.101	26.801	33.501	30.101	29.101	32.501	37.001	28.601	29.901	28.801	27.701	26.301	30.601	26.401	34.001	30.401	30.401	31.501	28.401	100.001
KJ641711_BatACV8	25.301	28.101	26.301	27.701	22.101	26.201	24.701	24.501	27.801	31.601	28.901	27.301	25.901	28.701	28.001	28.801	24.201	30.001	27.201	37.201	33.501	30.501	26.001	24.801	26.901	25.001	23.001	26.901	25.001	25.501	28.601	27.901	27.201	28.301	28.201	27.901	27.901	23.801	100.001
KJ641727_BatACV5	27.801	28.401	26.901	26.501	25.601	26.301	24.901	22.401	28.001	30.101	30.801	30.701	28.201	26.501	26.501	34.401	26.801	35.401	25.001	30.301	28.401	29.201	26.601	25.701	25.201	26.501	27.901	26.201	25.201	24.401	26.101	28.101	24.501	29.201	31.601	30.901	26.401	26.601	61.801	100.001
KJ641716_BatACV12	28.201	32.001	34.201	28.701	26.901	24.801	29.201	27.601	27.201	28.601	30.601	30.501	31.201	27.901	28.401	36.701	29.601	36.701	26.201	32.801	31.201	34.201	27.701	29.101	26.801	26.601	26.501	27.301	25.601	26.001	29.401	26.601	27.901	28.801	31.001	29.701	28.301	27.201	50.701	57.801	100.001
KY370037_RoACV6	26.201	32.501	29.101	30.401	26.301	28.601	25.701	25.001	30.801	29.101	31.501	32.001	34.001	28.401	26.601	31.101	30.401	32.501	31.701	28.201	30.601	29.001	26.401	33.201	33.501	31.001	34.701	30.201	29.801	29.501	28.801	26.901	27.201	27.601	30.901	32.101	29.501	25.501	37.301	35.101	38.401	100.001
KJ641723_BatACV7	27.501	30.301	30.201	24.301	18.201	27.001	22.901	22.301	25.401	27.101	26.501	26.101	31.501	26.501	26.201	33.001	28.601	31.301	29.401	29.001	28.701	29.901	27.501	30.201	30.001	29.601	34.801	28.701	29.001	29.601	31.601	27.101	28.701	25.401	27.101	28.301	36.501	25.201	32.701	35.301	33.001	37.101	100.001
KJ641724_BatACV6	20.701	25.601	27.001	29.801	21.901	26.301	26.801	23.001	24.901	25.601	26.401	22.201	25.601	27.801	28.401	28.801	25.701	28.601	28.401	33.201	31.201	29.201	29.001	32.201	32.001	31.201	31.301	26.601	28.601	29.701	31.901	34.301	33.201	30.301	31.801	29.001	32.001	30.401	31.201	36.501	36.001	38.701	46.601	100.001
KT869077_PCV3	23.201	27.301	26.901	28.201	22.501	23.901	23.401	27.101	26.701	21.501	20.901	23.801	27.101	29.901	30.601	31.201	28.001	27.901	28.401	27.301	31.001	29.901	23.201	31.701	28.301	31.601	32.001	29.901	32.001	27.401	30.901	29.401	36.601	33.801	33.301	26.001	27.501	30.401	27.501	31.801	32.801	37.701	37.701	37.801	100.001
KY370027_RoACV5	25.001	23.401	26.401	26.901	22.501	24.301	24.401	23.901	23.301	26.401	29.801	27.601	21.701	27.801	25.601	24.801	26.701	29.101	26.301	25.801	29.401	25.401	27.901	30.201	31.201	29.501	29.901	27.401	27.901	24.401	24.601	24.101	26.501	30.301	29.001	22.001	26.001	24.101	28.101	29.201	25.401	30.801	32.301	29.601	30.501	100.001
LC416389_PanACV	26.301	26.401	22.901	23.501	19.601	24.001	25.701	25.801	23.501	22.101	22.901	25.301	26.301	25.301	25.301	27.901	27.201	30.001	26.101	28.801	23.701	25.301	28.601	29.201	33.201	29.201	30.301	24.801	32.901	28.201	28.601	24.901	21.701	22.601	23.801	31.201	21.101	27.701	26.801	25.401	24.001	29.701	26.601	29.001	32.101	37.101	100.001
	MN164703_PenCV	DQ845074_GuCV	AF071878_BFDV	AF252610_PiCV	MH188038_MosACV	DQ172906_StCV	GQ404851_ChimpACV	KU230452_TiACV1	AJ301633_CaPV	DQ146997_RaCV	KX987146_TiACV2	DQ845075_FiCV	KP793918_ZfiCV	MT610105_SonCV1	MT610107_SonCV1	KY370034_RoACV1	KY370042_RoACV2	KY370039_RoACV3	KC241982_CanineCV	KY370029_RoACV4	MF497827_RoACV7	MT610106_SonCV2	KX756986_BatACV10	AF027217_PCV2	AF071879_PCV1	KC339249_BatACV2	KX756996_BatACV11	JX863737_BatACV1	KJ020099_MiCV	KJ641741_BatACV9	JQ814849_BatACV3	KT783484_BatACV4	AJ304456_GoCV	EU056309_SwCV	DQ100076_DuCV	GQ404856_HuACV	JQ011377_EcatfishCV	GU799606_BarCV	KJ641711_BatACV8	KJ641727_BatACV5	KJ641716_BatACV12	KY370037_RoACV6	KJ641723_BatACV7	KJ641724_BatACV6	KT869077_PCV3	KY370027_RoACV5	LC416389_PanACV
